# Supplementary material
Source: publisher figshare collection journal article supplement (https://acs.figshare.com/ndownloader/files/3820879)
Supplement: Supplementary file 1 [file 3820879]

Compd 8;O=C(C(C1=NNC=C1C(C)(C)O2)=C2C=C3C(C)(C)CCCCCC)C3=O
Compd 9;O=C(C(C1=NN(C)C=C1C(C)(C)O2)=C2C=C3C(C)(C)CCCCCC)C3=O
Compd 10;O=C(C(C(N(CC)N=C1)=C1C(C)(C)O2)=C2C=C3C(C)(C)CCCCCC)C3=O
Compd 11;O=C(C1=C2OC(C)(C)C3=CNN=C13)C=C(C(C)(C)CCCCCC)C2=O
Compd 12;O=C(C1=C2OC(C)(C)C3=CN(C)N=C13)C=C(C(C)(C)CCCCCC)C2=O
Compd 13;O=C(C1=C2OC(C)(C)C3=CN(CC)N=C13)C=C(C(C)(C)CCCCCC)C2=O
